# Supplementary material for: The Effect of Different Seeding and Fertilizer Rates on Agronomic Traits, Yield and Yield Components of Two Fodder Oat(Avena Sativa) Varieties in Highlands of North Shewa, Oromia, Ethiopia
Source: Preprints.org preprint supplement (doi:10.20944/preprints202401.0917.v2), 2024-04-24
Supplement: Supplementary file 1 [file supplementary]

## Cover letter

Dear Agronomy Journal Editors,

How life is going on? I am very fine and well done. Dear, I am very interested and impressive you were given as contractive comments and suggestion on my article titled with “**The Effect of Different Seeding and Fertilizer Rates on Agronomic traits, Yield and yield components of Two Fodder Oat(*Avena Sativa*) Varieties in Highlands of North Shewa, Oromia, Ethiopia**” coded with **Manuscript ID: agronomy-2843894**. Dear, I have tried to incorporate major comments and suggestion that in **indicated by green** color where correction made. **As what was raised as a major problems was, the duration of the activity. The activity was conducted at one location for one year as part of student thesis.** Because of this, the authors recommended over years over locations experimental conduction to approve the current findings. I am very interested to all comments and suggestion, But I asked excuse me Agronomy Journals of my lateness response due to connection problems my local area as there were a conflict.

Thank you for your help!!
